# Supplementary material
Source: PubMed Central journal article supplement (PMC8693274)
Supplement: jama-e2121316-s003.pdf [file jama-e2121316-s003.pdf]

Syversen SW, Jørgensen KK, Goll GL, et al. Effect of therapeutic drug monitoring vs standard therapy during maintenance infliximab therapy on disease control in patients with immune-mediated inflammatory diseases: a randomized clinical trial. *JAMA*. Published December 21, 2021. doi:10.1001/jama.2021.21316

## Data Sharing Statement

### Data

**Data available:** Yes

**Data types:** Other (please specify)

**Additional Information:** A de-identified patient data set can be made available to researchers upon reasonable request. The data will only be made available after submission of a project plan outlining the reason for the request and any proposed analyses, and will have to be approved by the NOR-DRUM steering group. Project proposals can be submitted to the corresponding author. Data sharing will have to follow appropriate regulations. The study protocol and statistical analysis plan are made available together with the paper (Online-Only Supplement).

**How to access data:** A de-identified patient data set can be made available to researchers upon reasonable request. The data will only be made available after submission of a project plan outlining the reason for the request and any proposed analyses, and will have to be approved by the NOR-DRUM steering group. Project proposals can be submitted to the corresponding author [s.w.syversen@gmail.com](mailto:s.w.syversen@gmail.com). Data sharing will have to follow appropriate regulations. The study protocol and statistical analysis plan are made available together with the paper (Online-Only Supplement).

**When available:** With publication

### Supporting Documents

**Document types:** None

### Additional Information

**Who can access the data:** A de-identified patient data set can be made available to researchers upon reasonable request. The data will only be made available after submission of a project plan outlining the reason for the request and any proposed analyses, and will have to be approved by the NOR-DRUM steering group. Project proposals can be submitted to the corresponding author [s.w.syversen@gmail.com](mailto:s.w.syversen@gmail.com). Data sharing will have to follow appropriate regulations. The study protocol and statistical analysis plan are made available together with the paper (Online-Only Supplement)

**Types of analyses:** A de-identified patient data set can be made available to researchers upon reasonable request. The data will only be made available after submission of a project plan outlining the reason for the request and any proposed analyses, and will have to be approved by the NOR-DRUM steering group. Project proposals can be submitted to the corresponding author [s.w.syversen@gmail.com](mailto:s.w.syversen@gmail.com). Data Syversen SW, Goll GL, Jørgensen KK, et al. Effect of Therapeutic Drug Monitoring vs Standard Therapy During Infliximab Induction on Disease Remission in Patients With Chronic Immune-Mediated Inflammatory Diseases: a randomized clinical trial. *JAMA*. Published May 4, 2021. doi:10.1001/jama.2021.4172sharing will have to follow appropriate regulations. The study protocol and statistical analysis plan are made available together with the paper (Online-Only Supplement)

**Mechanisms of data availability:** A de-identified patient data set can be made available to researchers upon reasonable request. The data will only be made available after submission of a project plan outlining the reason for the request and any proposed analyses, and will have to be approved by the NOR-DRUM steering group. Project proposals can be submitted to the corresponding author [s.w.syversen@gmail.com](mailto:s.w.syversen@gmail.com). Data sharing will have to follow appropriate regulations. The study protocol and statistical analysis plan are made available together with the paper (Online-Only Supplement)
